# Supplementary material for: Mechanism of coverage dependent CO adsorption and dissociation on the Mo(100) surface
Source: Royal Society of Chemistry journal article supplement (doi:10.1039/c6cp08129k), 2016-12-14

Mechanism of Coverage Dependent CO Adsorption and Dissociation on the Mo(100) Surface

Xinxin Tian,<sup>a</sup> Tao Wang,<sup>b</sup> Haijun Jiao<sup>c\*</sup>

*a) Institute of Molecular Science, Key Laboratory of Materials for Energy Conversion and Storage of Shanxi Province, Shanxi University, Taiyuan 030006, China; b) Univ Lyon, Ens de Lyon, CNRS, Université Lyon 1, Laboratoire de Chimie UMR 5182, F-69342, Lyon, France; c) Leibniz-Institut für Katalyse e.V. an der Universität Rostock, Albert-Einstein Strasse 29a, 18059 Rostock, Germany.*

E-mail address: [haijun.jiao@catalysis.de](mailto:haijun.jiao@catalysis.de)

**Content**

**Fig. S1-S10 All calculated transition state structures for CO dissociation at all coverage**

**Fig. S1:** Structures of 1CO dissociation on Mo(100) surface.

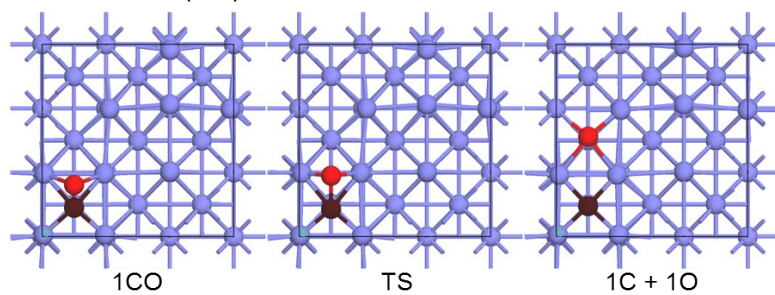

**Fig. S2:** Structures of 2CO dissociation on Mo(100) surface.

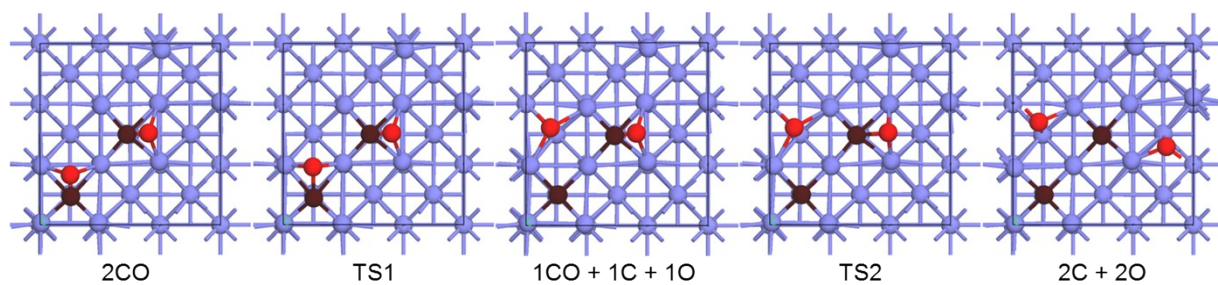

**Fig. S3:** Structures of 3CO dissociation on Mo(100) surface.

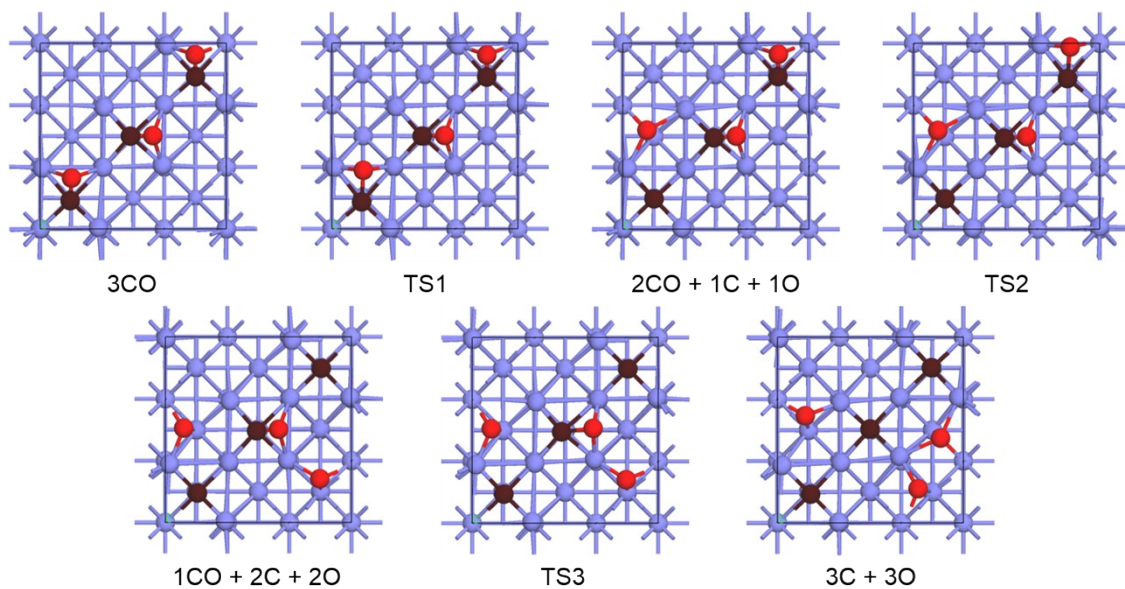

Figure S4: Structures of 4CO dissociation on Mo(100) surface.

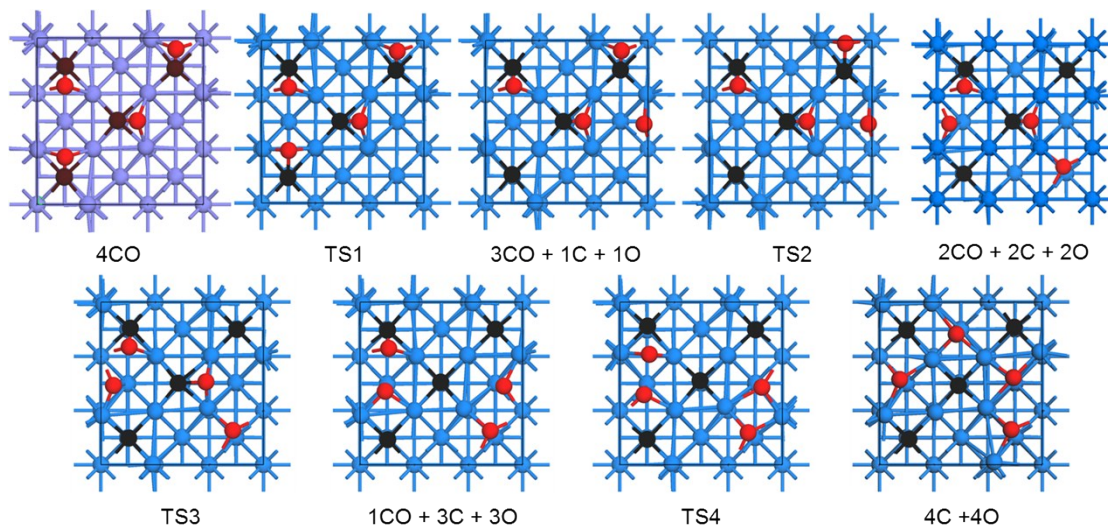

Figure S5: Structures of 5CO dissociation on Mo(100) surface.

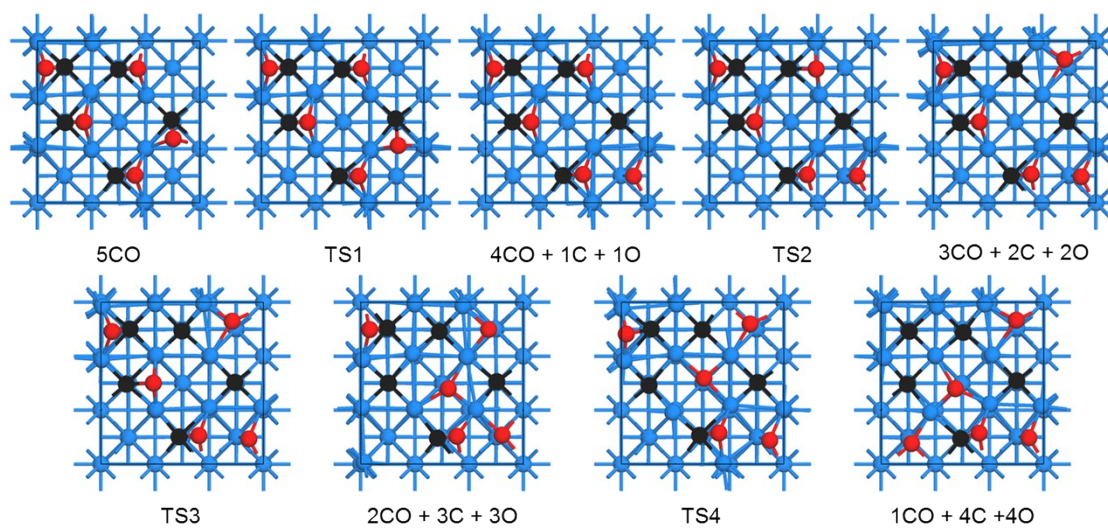

Figure S6: Structures of 6CO dissociation on Mo(100) surface.

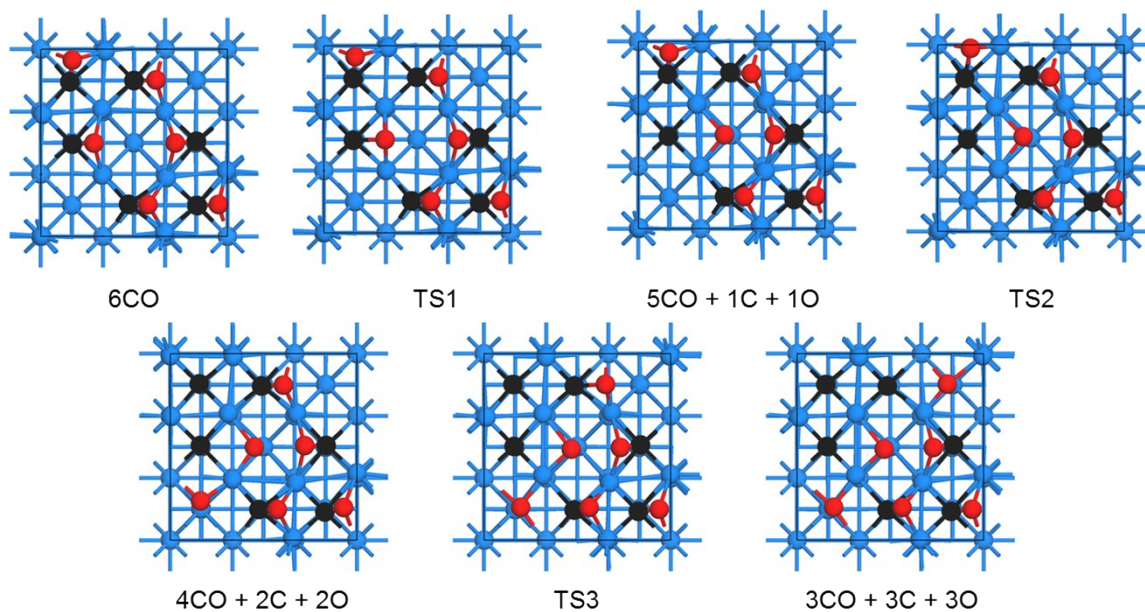

Figure S7: Structures of 7CO dissociation on Mo(100) surface.

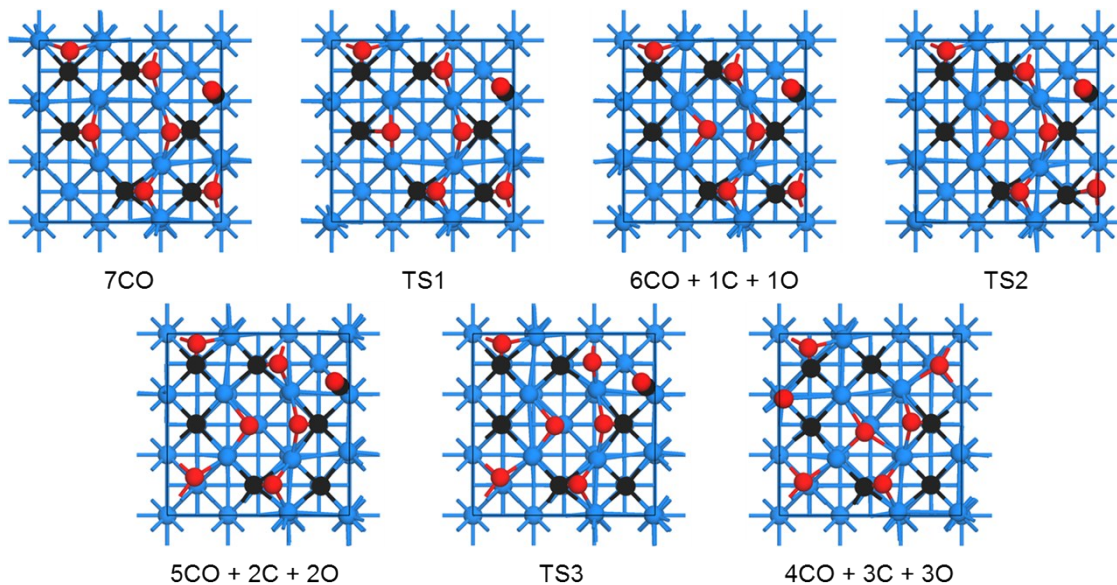

**Fig. S8:** Structures of 8CO dissociation on Mo(100) surface.

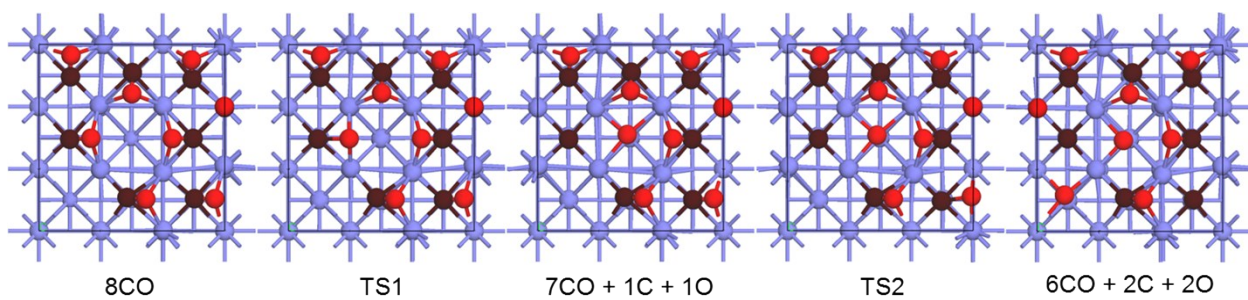

**Fig. S9:** Structures of 9CO dissociation on Mo(100) surface.

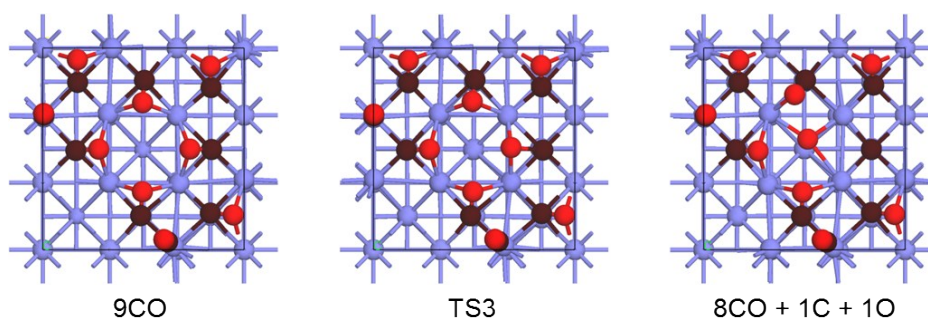

**Fig. S10:** Structures of 10CO dissociation on Mo(100) surface.

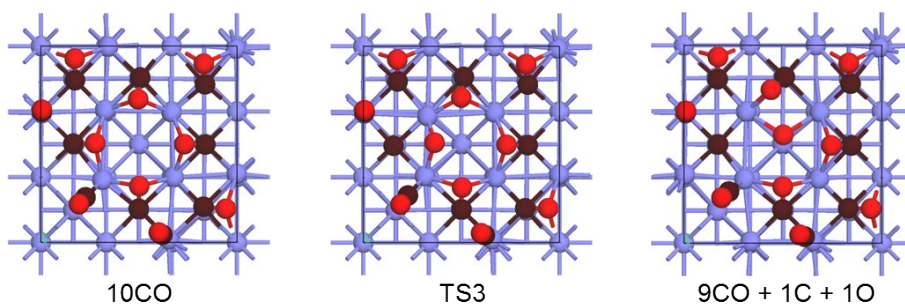

Supplement: c6cp08129k1.pdf [file c6cp08129k1.pdf]
